# Supplementary material for: Eicosapentaenoic acid shows anti-inflammatory effect via GPR120 in 3T3-L1 adipocytes and attenuates adipose tissue inflammation in diet-induced obese mice
Source: Springer Nature journal article supplement (doi:10.1186/s12986-017-0188-0), 2017-05-08
Supplement: MOESM1 [file 25660652]

## Supplementary Material

Supplementary Figure 1.

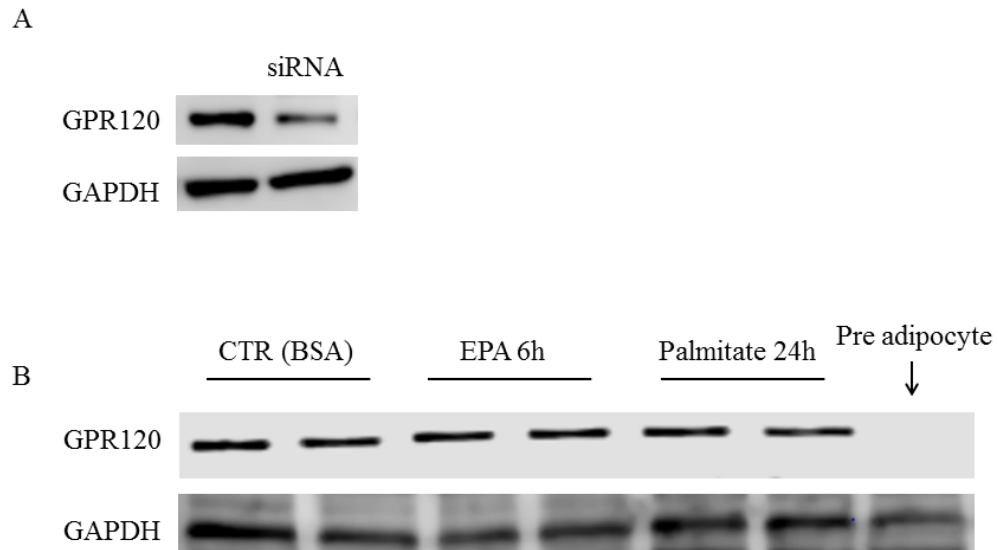

Supplementary Figure 1. Efficacy of siRNA for GPR120 (a) and GPR120 protein expression analysis in 3T3-L1 adipocytes (CTR, eicosapentaenoic acid 6h, palmitate 24h exposure) and preadipocytes by western bot (b).

Supplementary Figure 2.

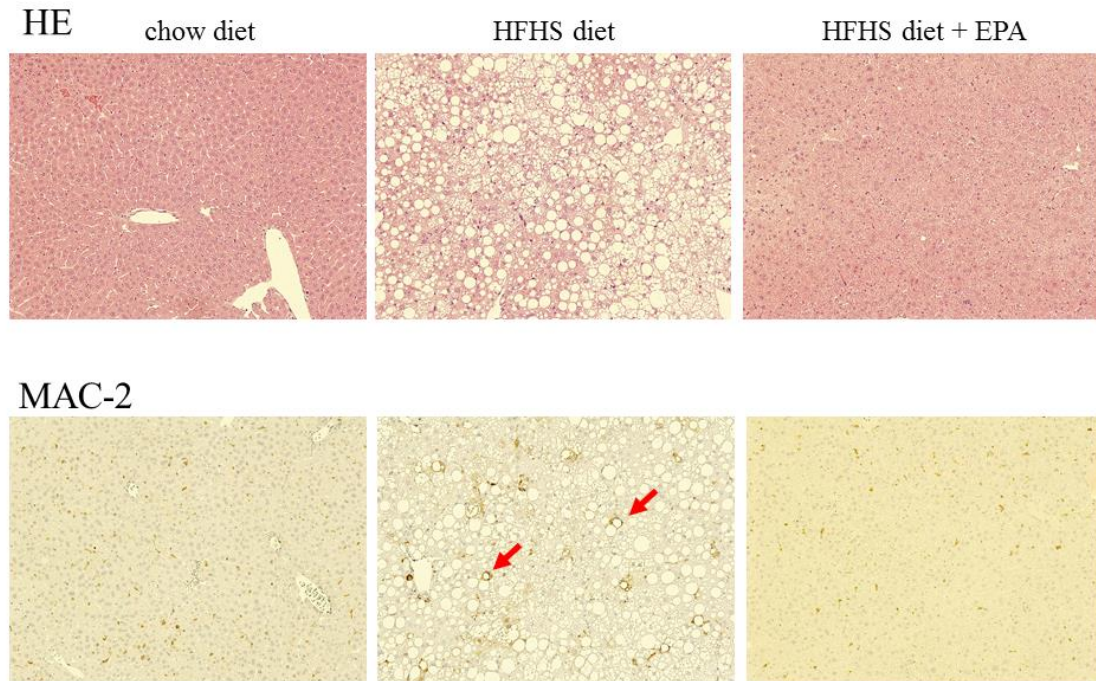

Supplementary Figure 2. Liver histological analysis by HE staining and MAC-2 staining ( $\times 100$ ). Red arrows indicated hepatic CLS formation.

Supplementary Figure 3.

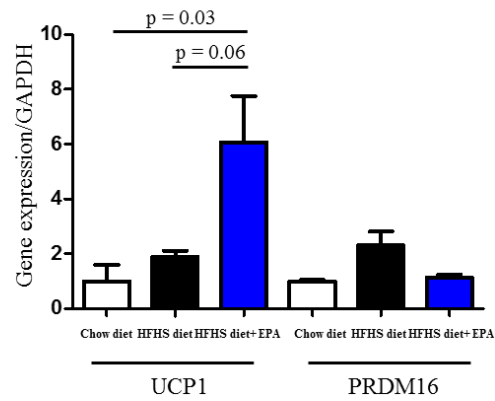

Supplementary Figure 3. EPA supplementation-induced beige-like marker in epididymal adipose tissue. mRNA expression of uncoupling protein 1 (UCP1) and PR domain containing (PRDM) 16 was evaluated in each diet groups. Data are presented as the mean  $\pm$  SEM of five independent experiments.

Supplementary Figure 4.

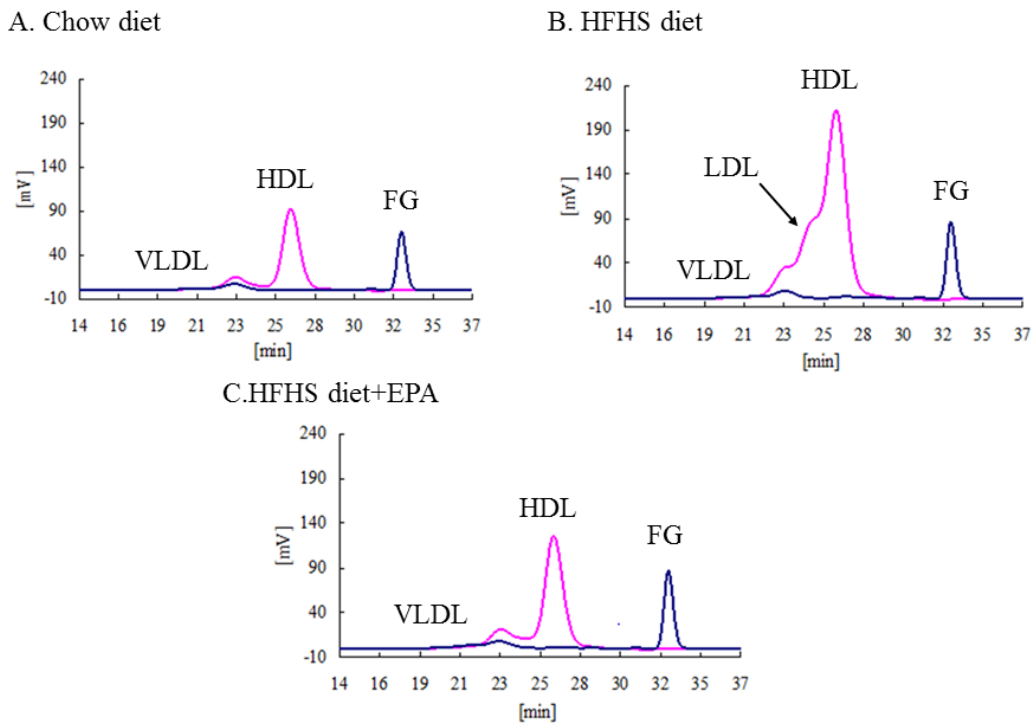

Supplementary Figure 4. Cholesterol and triglyceride profile by HPLC.

Lipid fraction of chow diet (a), high-fat/high-sucrose (HFHS) diet (b), and HFHS diet + eicosapentaenoic acid (c). The blue line represents triglyceride and pink line represents cholesterol contents. The LDL peak was found in HFHS diet plasma (b). VLDL, very low-density lipoprotein; LDL, low-density lipoprotein; HDL, high-density lipoprotein; FG, free glycerol. Method of this analysis is described in the following supplementary method.

Supplementary Table 1. Taq Man® Gene Expression ID information

| Taq Man Gene  | Assay ID      |
|---------------|---------------|
| MCP-1         | Mm00441242_m1 |
| TNF- $\alpha$ | Mm00443258_m1 |
| CD11c         | Mm00498701_m1 |
| CD206         | Mm01329362_m1 |
| IL-6          | Mm00446190_m1 |
| IL-10         | Mm01288386_m1 |
| UCP1          | Mm01244861_m1 |
| PRDM16        | Mm00712556_m1 |
| GAPDH         | Mm99999915_g1 |

Supplementary Table 2. Analysis of plasma lipoproteins by HPLC

| Group                 | Weeks | Cholesterol<br>(mg/dL) |      |       |       | Triglyceride<br>(mg/dL) |       |       |      |
|-----------------------|-------|------------------------|------|-------|-------|-------------------------|-------|-------|------|
|                       |       | CM                     | VLDL | LDL   | HDL   | CM                      | VLDL  | LDL   | HDL  |
| Chow<br>diet          | 12 w  | 0.7                    | 5.68 | 15.92 | 72.46 | 2.45                    | 18.11 | 10.81 | 1.77 |
|                       | 18 w  | 0.78                   | 6.88 | 15.2  | 70.51 | 4.81                    | 27.95 | 11.53 | 2.38 |
|                       | 24 w  | 0.48                   | 3.4  | 9.39  | 46.78 | 1.69                    | 8.41  | 10.93 | 1.64 |
| HFHS<br>diet          | 12 w  | 0.3                    | 2.37 | 45.02 | 129.5 | 0.8                     | 5.94  | 10.76 | 2.59 |
|                       | 18 w  | 0.23                   | 3.23 | 51.19 | 128.9 | 0.46                    | 4.16  | 12.01 | 3.98 |
|                       | 24 w  | 0.16                   | 3.87 | 55.07 | 128.8 | 0.53                    | 7.81  | 13.53 | 4.6  |
| HFHS<br>diet +<br>EPA | 12 w  | 0.11                   | 2.6  | 12.94 | 68.5  | 0.21                    | 6.93  | 10.08 | 2.83 |
|                       | 18 w  | 0.16                   | 2.63 | 17.47 | 67.23 | 0.28                    | 5.28  | 9.22  | 3.37 |
|                       | 24 w  | 0.17                   | 3.59 | 15.92 | 66.32 | 0.53                    | 11.45 | 12.99 | 3.2  |

CM, chylomicron; VLDL, very low-density lipoprotein; LDL, low-density lipoprotein; HDL, high-density lipoprotein. CM (>80 nm), VLDL (30–80 nm), LDL (16–30 nm), HDL (8–16 nm); EPA, eicosapentaenoic acid.

### **Supplementary method**

Plasma lipoprotein fractions were analyzed with a high-performance liquid chromatography (HPLC) system at Skylight Biotech (LipoSEARCH, Akita, Japan). For this analysis, plasma samples were collected from each group and pooled. Results are shown in Supplementary Table 2.
